# Supplementary material
Source: publisher figshare collection journal article supplement (https://sage.figshare.com/ndownloader/files/15473180)
Supplement: Supplementary file 1 [file 15473180]

Timestamp	Nickname	Gender	Age	Child_Country	Current_Country	Same_Town	Education	SES	Env_01	Env_02	Env_03	Env_04	Env_05	Env_06	Env_07	Env_08	Env_09	Env_10	Env_11	Env_12	Env_13	Env_14	Env_15	Env_16	Env_17	Env_18	Env_19	Env_20	Env_21	Env_22	Env_23	Env_24	Env_25	Env_26	Env_27	Env_28	Env_29	Env_30	Env_31	Env_32	Adv_04	Lib_07	Lib_04	Adv_07	Int_10	Emo_09	Art_02	Emo_02	Art_10
2017/02/08 1:13:23 PM GMT	1902	Female	21	United Kingdom	United Kingdom	No	16	7	4	5	2	4	4	2	4	6	4	3	6	2	3	3	2	5	4	5	2	5	2	1	2	2	3	5	4	5	4	5	3	5	3	3	6	2	5	5	4	2	3
2017/02/09 2:17:42 PM GMT	1902	Female	18	United Kingdom	United Kingdom	No	14	7	4	5	2	4	4	1	5	6	1	3	6	1	5	5	2	3	5	2	5	5	3	NA	4	2	2	1	3	6	5	5	4	4	5	2	6	5	4	4	6	5	4
2017/02/09 10:53:19 PM GMT	3Shadow	Female	20	United States	Australia	No	3	9	5	6	4	4	5	5	5	6	3	3	6	1	1	6	6	6	1	4	4	5	3	4	3	3	4	4	3	6	4	4	4	1	6	3	6	6	4	2	6	6	5
2017/02/10 3:31:04 PM GMT	3Shadow	Male	18	United States	United Kingdom	No	15	8	5	6	6	4	5	3	2	6	5	3	4	1	1	6	6	6	2	2	1	1	1	NA	6	2	2	2	4	6	5	6	2	3	6	3	4	2	4	3	6	6	3
2017/02/11 6:08:21 PM GMT	AANO3	Female	22	Norway	United Kingdom	No	15	7	2	4	6	3	5	2	2	2	3	2	4	1	2	5	5	6	2	2	2	2	1	4	5	2	6	2	4	5	4	5	2	2	4	2	5	3	5	4	5	3	6
2017/02/11 6:21:35 PM GMT	AANO3	Male	18	Norway	Norway	No	12	8	1	5	5	4	5	4	3	1	2	1	2	1	1	6	5	6	1	5	1	1	6	1	4	1	1	1	2	1	5	1	2	3	3	3	6	2	4	2	6	5	5
2017/02/09 8:33:11 PM GMT	Agnes	Female	20	United Kingdom	United Kingdom	Yes	14	5	3	4	6	3	3	2	3	6	2	2	5	1	2	5	4	2	2	1	1	2	5	3	6	1	1	1	4	5	6	6	4	5	5	2	4	4	3	5	6	6	5
2017/02/09 8:40:24 PM GMT	Agnes	Female	20	United Kingdom	United Kingdom	Yes	16	6	4	5	1	4	5	1	4	6	4	2	4	1	1	6	3	2	1	1	1	1	4	4	4	1	1	1	3	5	4	5	2	1	4	1	3	3	6	6	6	5	4
2017/02/14 12:14:48 PM GMT	amandal	Male	46	United Kingdom	United Kingdom	Yes	10	4	4	6	4	1	5	4	3	1	5	2	2	1	1	6	6	2	1	1	1	1	1	1	2	2	2	1	2	2	3	5	1	6	5	2	6	6	4	6	5	5	5
2017/02/14 7:49:37 PM GMT	amandal	Female	49	United Kingdom	Australia	No	17	5	5	6	5	5	6	4	6	6	5	3	6	1	2	6	2	6	6	6	1	6	3	NA	6	5	6	1	6	6	6	6	6	6	5	3	6	4	6	6	6	5	6
2017/02/10 11:13:30 PM GMT	Bale	Male	20	United Kingdom	United Kingdom	No	14	7	5	2	1	1	5	1	1	6	2	1	6	1	1	6	1	4	1	1	1	1	1	NA	4	1	1	1	1	3	6	4	3	2	4	3	4	3	2	4	5	4	4
2017/02/10 8:53:30 PM GMT	Bale	Female	22	United Kingdom	United Kingdom	No	16	6	3	4	1	1	4	4	3	3	3	3	4	2	2	6	2	6	2	1	1	1	1	2	2	2	1	3	1	6	4	5	2	1	4	3	5	3	4	4	6	6	6
2017/02/09 1:01:25 PM GMT	Barnhead	Male	18	United Kingdom	United Kingdom	No	16	7	2	5	6	4	4	3	2	1	2	3	5	1	2	6	1	1	6	5	1	1	1	3	3	1	6	5	1	2	6	1	3	6	6	4	6	6	1	4	6	3	6
2017/02/09 12:54:48 PM GMT	Barnhead	Female	19	United Kingdom	United Kingdom	No	16	7	6	5	3	2	5	4	3	5	5	4	6	1	2	5	4	4	2	2	3	5	3	2	3	2	2	3	3	3	5	3	3	5	5	3	1	3	4	4	6	5	5
2017/02/12 2:04:46 PM GMT	Beans10	Male	22	United Kingdom	United Kingdom	No	13	8	3	4	2	4	4	4	1	6	4	3	5	1	1	4	5	5	3	4	1	1	3	1	5	1	1	1	3	6	5	3	3	1	5	2	6	6	4	5	4	3	1
2017/02/12 2:29:48 PM GMT	Beans10	Female	20	United Kingdom	United Kingdom	No	16	6	4	5	2	2	6	5	4	6	4	3	6	1	1	6	2	6	1	1	1	5	1	1	5	1	1	1	1	6	6	6	1	3	6	3	6	6	5	3	6	6	3
2017/02/15 10:22:00 am GMT	Bendystraw cabbagepatch	Female	22	United Kingdom	United Kingdom	Yes	17	7	6	6	4	4	6	5	5	6	6	4	5	5	3	5	2	6	5	4	2	5	2	6	5	5	5	4	5	6	5	4	5	5	5	4	6	6	3	5	6	6	5
2017/02/08 11:41:25 AM GMT	Bibi	Female	20	France	United Kingdom	No	16	6	5	4	1	3	5	1	6	1	4	1	1	1	1	6	1	6	6	4	4	4	3	4	3	4	3	5	4	3	3	5	4	3	3	4	5	4	4	3	6	6	6
2017/02/08 1:09:25 PM GMT	Bisty	Female	21	United Kingdom	United Kingdom	No	18	7	6	3	6	5	1	1	3	3	4	2	5	1	4	6	4	6	1	3	2	6	1	3	6	6	1	5	5	6	3	6	2	5	6	3	3	6	6	6	6	5	4
2017/02/09 8:10:53 PM GMT	Blaw	Male	54	United Kingdom	United Kingdom	No	16	7	6	5	4	4	4	4	4	5	5	4	5	5	3	6	2	5	3	5	2	2	6	2	3	3	5	2	6	5	6	4	5	4	5	3	6	5	5	6	6	5	3
2017/02/11 12:29:37 PM GMT	Blaw	Male	51	United Kingdom	United Kingdom	No	16	9	5	5	5	5	5	5	5	5	5	4	5	1	3	6	5	6	5	3	2	5	5	5	2	4	5	4	4	6	6	6	5	1	5	2	6	5	5	3	6	4	3
2017/02/09 7:36:21 PM GMT	BMW	Female	20	France	United Kingdom	No	16	8	1	5	3	4	2	5	3	6	5	4	5	3	2	4	5	5	3	5	4	5	3	4	3	4	5	2	5	5	4	5	4	5	6	3	6	5	5	6	6	5	6
2017/02/09 11:48:04 PM GMT	Boo	Female	22	United Kingdom	United Kingdom	No	4	6	3	5	6	5	5	5	5	5	5	5	5	5	5	2	5	5	5	5	5	5	5	5	5	5	5	5	5	5	5	5	5	5	5	5	6	6	6	6	6	6	6
2017/02/10 5:42:29 AM GMT	Boo	Female	25	United Kingdom	New Zealand	No	19	6	5	6	5	6	6	4	3	2	5	2	6	5	2	6	4	6	6	5	4	3	6	NA	4	4	5	4	4	6	6	6	6	3	6	3	5	6	6	6	6	6	3
2017/02/10 3:08:32 PM GMT	Carternators	Male	18	United Kingdom	United Kingdom	No	14	6	3	5	2	3	3	2	2	6	4	3	5	1	1	6	2	6	1	2	2	4	1	3	3	3	2	2	4	2	3	4	4	5	5	3	3	3	5	3	6	5	3
2017/02/10 5:06:27 PM GMT	Carternators	Female	21	United Kingdom	United Kingdom	No	17	6	5	3	4	3	4	5	3	4	5	4	2	1	1	6	5	5	6	3	6	5	1	1	6	1	2	3	6	6	6	6	6	5	6	2	3	4	6	4	6	5	1
2017/02/15 11:40:46 am GMT	CC	Female	20	United Kingdom	United Kingdom	No	15	7	2	5	2	4	4	2	2	2	5	2	3	2	2	6	2	3	2	5	2	4	2	2	2	2	5	5	2	5	4	5	3	5	3	2	5	3	4	5	5	4	4
2017/02/09 5:57:54 PM GMT	ceres	Male	20	United States	United Kingdom	Yes	15	10	3	6	2	5	3	4	4	3	3	4	1	2	2	2	6	5	1	2	2	1	3	5	4	2	1	2	3	1	1	2	2	3	5	5	6	6	5	5	6	5	5
2017/02/09 6:34:08 PM GMT	ceres	Male	18	United States	United Kingdom	Yes	14	8	5	4	3	1	6	1	2	6	5	4	4	4	1	2	5	5	1	3	5	1	1	5	4	4	1	3	4	1	3	3	4	3	5	5	5	4	5	6	6	6	6
2017/02/15 3:35:45 pm GMT	Cheeky	Female	21	United Kingdom	United Kingdom	No	16	6	4	6	4	4	5	4	5	6	4	4	2	2	2	6	5	6	4	4	5	5	3	5	4	4	2	3	4	6	4	4	5	2	5	4	6	6	5	4	6	6	5
2017/02/16 10:24:54 am GMT	Cheeky	Male	22	United Kingdom	United Kingdom	No	17	3	5	6	4	5	5	4	5	6	5	5	5	4	4	6	5	6	5	5	4	5	3	4	6	5	4	5	5	6	5	5	4	3	6	3	6	5	5	6	6	5	5
2017/02/09 11:40:35 PM GMT	cheeseballs	Female	20	Spain	United Kingdom	No	3	7	5	5	3	4	5	4	4	4	4	5	4	4	3	6	5	6	4	5	4	5	3	5	2	5	3	4	3	4	4	3	4	4	4	2	6	4	5	3	6	5	5
2017/02/08 1:11:47 PM GMT	Chi	Male	20	United Kingdom	United Kingdom	No	15	6	5	3	1	3	3	5	3	5	3	3	2	2	3	6	4	5	5	2	3	1	5	1	6	3	1	5	2	3	4	3	2	1	5	2	1	2	5	5	6	5	3
2017/02/08 12:47:48 PM GMT	Chi	Female	20	Zambia	United Kingdom	No	15	6	6	6	6	6	6	2	4	6	6	5	1	3	3	2	4	6	6	4	4	1	6	4	3	5	3	3	6	1	1	5	2	5	6	3	3	6	3	1	6	5	6
2017/02/10 5:15:08 PM GMT	Cliterati	Female	25	United Kingdom	United Kingdom	Yes	22	8	5	5	5	4	4	5	5	2	2	3	6	1	1	6	4	6	5	2	1	5	6	4	6	3	5	3	2	6	4	1	3	1	5	3	6	5	5	6	6	6	6
2017/02/10 5:41:03 PM GMT	Cliterati	Female	19	United Kingdom	United Kingdom	Yes	14	8	6	5	2	2	4	2	3	6	2	3	2	1	1	6	1	6	5	4	2	5	2	4	4	3	4	2	3	6	4	2	3	4	5	3	6	2	3	1	5	3	5
2017/02/09 6:54:52 AM GMT	Crackers	Male	22	United Kingdom	United Kingdom	No	17	8	5	5	4	3	4	5	2	6	5	5	1	2	2	6	5	6	1	5	2	5	2	NA	2	4	3	2	3	4	4	2	3	1	6	3	6	5	2	4	5	5	5
2017/02/09 11:34:07 AM GMT	Craggsy	Female	20	United Kingdom	United Kingdom	Yes	15	7	2	3	2	4	5	3	2	5	3	2	5	3	1	6	2	5	2	5	4	4	1	4	2	3	2	2	2	5	4	4	3	5	4	3	5	6	6	4	6	4	5
2017/02/09 10:06:36 PM GMT	Curtains	Female	20	United Kingdom	United Kingdom	No	15	6	2	5	6	3	4	1	4	1	1	2	6	1	1	6	6	5	1	1	1	1	1	3	4	1	1	1	6	5	5	2	3	3	6	4	6	6	6	6	6	4	5
2017/02/10 4:31:24 PM GMT	Curtains	Male	23	United Kingdom	United Kingdom	No	18	6	2	5	6	2	5	2	2	6	6	4	2	1	1	6	4	5	3	1	1	1	1	2	5	3	2	2	1	5	4	3	4	4	4	3	6	4	5	2	6	3	3
2017/02/15 5:14:40 pm GMT	DAMACH	Female	30	Chile	United Kingdom	No	18	6	2	6	2	2	5	4	4	6	5	3	6	1	4	6	6	5	1	5	3	2	2	NA	4	5	4	2	5	4	4	5	3	6	6	6	5	6	5	4	6	5	6
2017/02/19 11:11:18 pm GMT	dida and sassa	Female	18	United Kingdom	United Kingdom	No	14	8	3	5	1	5	4	3	4	6	6	4	6	4	4	6	5	6	6	4	3	5	1	NA	3	5	4	2	5	6	3	3	4	3	5	6	6	6	4	5	3	6	5
2017/02/17 6:40:54 pm GMT	dida and sassa	Female	20	United Kingdom	United Kingdom	No	16	7	5	3	4	3	5	4	5	1	6	3	3	1	2	6	5	6	2	2	2	6	5	4	3	2	5	2	4	6	6	1	4	6	2	4	6	2	6	3	6	5	2
2017/02/09 6:43:21 PM GMT	dog	Male	45	United Kingdom	United Kingdom	Yes	11	6	1	6	6	6	6	4	4	4	5	6	1	3	3	1	6	6	6	3	1	3	6	NA	6	6	1	4	6	6	6	6	1	1	6	1	4	4	1	4	3	4	1
2017/02/09 9:28:45 PM GMT	dog	Female	47	United Kingdom	United Kingdom	Yes	12	7	5	5	2	3	2	3	3	2	4	2	3	2	3	5	4	4	4	5	2	4	5	2	4	3	5	5	4	3	4	5	3	3	3	3	2	4	4	4	5	5	5
2017/02/26 12:33:56 pm GMT	Dongle	Male	42	United Kingdom	United Kingdom	No	18	7	5	6	6	6	6	5	5	6	6	6	5	5	3	6	5	6	6	6	6	6	5	5	6	6	6	6	5	6	6	1	6	6	6	2	6	6	6	2	6	5	5
2017/02/26 9:46:38 am GMT	Dongle	Male	44	United Kingdom	United Kingdom	No	11	8	6	5	6	3	5	6	3	1	6	6	6	6	3	6	6	6	1	4	1	1	6	1	6	1	4	2	6	6	1	6	3	6	6	1	6	6	6	2	6	6	1
2017/02/09 8:09:54 PM GMT	Donkey	Female	20	United Kingdom	United Kingdom	No	16	6	5	6	1	2	2	3	2	5	4	2	6	1	1	6	3	6	1	2	2	5	1	NA	3	4	1	2	2	6	2	2	2	2	5	2	6	5	3	5	6	6	4
2017/02/09 8:17:17 PM GMT	Donkey	Female	18	United Kingdom	United Kingdom	No	13	6	4	6	4	2	3	2	2	5	2	1	6	1	3	6	4	5	6	2	1	2	1	NA	1	2	2	2	3	5	5	5	3	2	5	2	6	5	1	5	6	3	2
2017/02/10 9:04:10 PM GMT	Doog	Male	22	United Kingdom	United Kingdom	No	9	9	5	6	6	3	6	5	4	2	6	5	6	1	1	4	3	6	5	5	3	1	2	5	3	2	5	5	5	4	6	6	5	4	5	2	6	5	6	6	6	5	4
2017/02/10 9:10:54 PM GMT	Doog	Male	18	United Kingdom	United Kingdom	No	14	8	2	2	1	1	1	1	2	1	1	1	6	1	1	4	6	6	1	6	1	1	1	1	6	1	1	2	2	2	1	2	1	1	4	2	6	1	1	3	6	6	3
2017/02/08 1:08:55 PM GMT	DU123	Male	18	United Kingdom	United Kingdom	Yes	14	3	3	5	1	2	4	1	3	6	1	2	5	1	1	6	5	6	2	3	1	1	1	6	1	1	1	4	2	2	3	5	3	3	5	3	2	4	3	4	6	5	2
2017/02/08 12:56:55 PM GMT	DU123	Female	18	United Kingdom	United Kingdom	Yes	14	2	2	3	4	2	5	1	3	3	1	1	1	1	3	3	4	5	1	2	1	1	1	NA	3	2	2	3	2	6	4	3	1	5	4	3	6	3	3	5	6	5	3
2017/02/08 1:04:48 PM GMT	Dumbledores army	Male	23	United Kingdom	United Kingdom	No	16	5	4	6	3	5	5	3	4	5	5	5	2	2	4	5	6	6	4	6	6	6	1	1	4	6	6	5	5	3	6	5	5	4	5	2	6	6	6	6	6	5	6
2017/02/08 2:03:57 PM GMT	Flyboy	Male	27	United Kingdom	United Kingdom	No	19	5	2	6	2	1	4	2	2	5	4	1	4	1	1	6	2	5	3	2	1	1	1	2	2	1	2	1	3	6	6	6	1	4	6	1	6	6	6	1	6	6	6
2017/02/08 6:55:07 PM GMT	Flyboy	Male	22	United Kingdom	United Kingdom	No	18	4	5	6	2	2	5	5	2	1	4	2	6	1	1	5	5	2	1	2	1	1	6	1	4	5	2	2	2	5	6	5	4	2	4	2	6	5	4	6	6	5	2
2017/02/13 12:58:20 PM GMT	Forni	Male	20	Brazil	United Kingdom	No	16	7	5	3	1	4	4	5	3	6	4	3	5	3	1	6	3	5	2	5	3	3	1	4	4	4	2	4	4	5	3	3	3	3	6	3	6	6	6	2	5	6	6
2017/02/14 11:24:44 AM GMT	Forni	Male	20	Brazil	United Kingdom	No	20	7	5	5	1	4	5	5	2	6	4	4	5	5	2	6	6	6	6	5	5	4	1	NA	1	4	3	4	4	5	5	5	4	3	6	3	5	4	5	3	5	6	5
2017/02/08 11:43:20 AM GMT	Frajoz	Female	23	United Kingdom	United Kingdom	Yes	17	3	5	6	4	2	5	4	3	6	6	5	6	1	1	6	3	6	2	4	2	3	5	4	6	4	2	5	5	6	5	5	6	1	6	2	6	5	5	6	6	5	6
2017/02/09 8:43:48 PM GMT	Garnerama	Female	23	United Kingdom	United Kingdom	No	19	8	5	6	3	5	4	5	3	3	6	5	5	1	1	6	3	3	1	5	3	6	1	6	3	6	3	5	5	6	5	4	6	3	6	3	6	6	6	6	6	6	6
2017/02/09 8:43:52 PM GMT	Garnerama	Female	18	United Kingdom	United Kingdom	No	12	5	5	6	4	3	6	2	4	6	4	5	6	2	2	6	2	6	6	4	5	4	3	NA	6	5	5	5	5	5	5	5	5	5	6	3	6	6	6	6	6	5	6
2017/02/09 9:10:05 PM GMT	Garnerama	Male	19	United Kingdom	United Kingdom	No	15	7	5	6	5	3	4	2	4	6	6	4	5	1	1	5	6	6	5	5	5	2	1	6	5	4	1	1	6	6	6	5	2	5	6	3	6	5	3	6	6	6	4
2017/02/09 8:47:06 PM GMT	Garnerama2	Female	24	United Kingdom	United Kingdom	No	18	7	6	6	6	4	5	6	6	6	6	6	6	4	2	6	5	6	5	6	6	6	4	6	6	6	6	6	6	6	6	6	6	6	6	2	6	6	6	5	6	6	6
2017/02/09 8:53:07 PM GMT	Garnerama2	Female	21	United Kingdom	Canada	No	17	7	6	5	5	3	6	4	4	6	6	5	1	5	2	6	5	6	6	5	5	6	2	2	6	5	3	5	5	6	6	3	5	6	6	4	6	6	5	6	6	5	2
2017/02/08 2:09:35 PM GMT	Gary	Female	19	United Kingdom	United Kingdom	No	16	5	4	5	5	4	4	2	5	5	3	3	3	3	3	4	5	5	2	3	2	2	4	5	3	3	2	3	3	4	3	2	2	2	5	4	6	3	1	6	6	6	6
2017/02/08 3:55:17 PM GMT	Gary	Female	21	United Kingdom	United Kingdom	No	10	3	5	6	3	4	3	2	5	6	5	5	4	2	2	6	2	6	1	5	4	6	2	4	5	3	3	4	3	4	5	5	3	6	5	4	6	4	5	6	6	5	5
2017/02/09 3:10:01 PM GMT	Geraghty	Female	21	United States	United Kingdom	No	15	8	5	5	1	2	5	4	4	5	2	1	6	3	1	6	3	6	1	5	1	5	1	1	3	3	5	3	4	5	5	5	4	2	5	5	6	5	6	5	5	5	5
2017/02/09 6:26:12 PM GMT	Geraghty	Female	27	United States	United States	No	17	9	3	3	5	3	3	1	3	5	3	2	4	1	1	5	2	5	4	2	2	3	2	1	2	2	2	2	2	5	5	3	2	4	5	4	5	5	3	2	5	4	3
2017/02/08 3:35:39 PM GMT	GFT	Female	22	United Kingdom	United Kingdom	No	18	7	4	6	1	2	3	3	2	6	4	1	5	1	1	6	5	5	2	2	1	2	3	4	4	1	2	1	2	4	5	5	5	5	4	1	6	4	2	6	4	4	4
2017/02/09 8:19:17 PM GMT	GFT	Female	25	United Kingdom	Switzerland	No	17	8	2	6	6	4	6	5	4	6	6	5	1	1	2	6	3	6	6	5	3	5	1	3	6	4	5	4	4	6	4	4	5	4	6	2	6	5	3	5	6	5	6
2017/02/10 6:46:57 PM GMT	Gillan	Male	22	United Kingdom	United Kingdom	No	18	5	6	6	4	4	5	3	5	6	5	3	6	1	3	6	5	6	3	5	4	1	6	5	6	5	1	2	4	5	5	4	5	2	6	2	6	6	6	3	6	6	3
2017/02/12 7:12:46 PM GMT	Gillan	Male	24	United Kingdom	United Kingdom	No	16	6	6	6	1	1	5	3	5	6	3	1	5	1	6	6	6	6	1	1	1	1	6	NA	6	1	1	1	1	6	5	1	1	1	5	2	6	5	1	1	6	4	1
2017/02/10 12:03:43 AM GMT	GreatUncleRoger'sGirls	Female	37	United States	United States	No	19	5	5	6	6	6	4	5	6	6	6	4	2	1	4	5	6	6	2	5	5	5	2	2	2	2	3	3	5	4	5	6	5	6	6	2	4	6	6	6	6	6	5
2017/02/10 12:21:17 AM GMT	GreatUncleRoger'sGirls	Female	39	United States	United States	No	20	6	5	6	6	4	5	5	3	1	4	5	2	1	6	3	5	5	1	5	1	1	3	5	2	5	3	5	2	2	5	6	5	6	4	3	3	3	6	5	6	6	6
2017/02/09 4:25:46 PM GMT	Green	Male	21	United Kingdom	United Kingdom	Yes	17	7	5	5	3	3	4	4	4	3	3	4	2	2	2	6	5	6	1	5	2	6	2	6	2	4	4	5	2	5	5	5	5	4	4	4	3	4	5	6	6	4	3
2017/02/09 7:46:38 PM GMT	Green	Male	19	United Kingdom	United Kingdom	Yes	15	7	4	2	2	1	4	2	3	5	5	4	2	1	1	3	1	5	1	1	2	1	1	NA	3	2	1	2	3	5	5	5	3	2	4	4	5	4	2	3	6	5	3
2017/02/14 12:53:24 PM GMT	Ham	Female	20	United Kingdom	United Kingdom	Yes	16	5	5	6	4	4	4	5	4	6	3	3	4	2	4	5	5	5	4	2	2	4	5	4	5	2	3	4	5	5	5	5	4	4	5	2	6	2	5	2	5	5	5
2017/02/09 10:36:49 PM GMT	Hammy	Female	20	United Kingdom	United Kingdom	Yes	16	7	4	5	2	1	3	4	3	6	3	2	5	1	2	5	5	5	6	2	2	4	6	1	6	2	1	2	2	6	5	2	4	5	2	3	5	5	5	5	5	4	2
2017/02/14 1:09:31 PM GMT	Hammy	Female	18	United Kingdom	United Kingdom	Yes	14	5	4	5	5	5	6	3	5	6	6	4	6	2	3	4	5	6	5	4	2	6	6	NA	5	3	3	5	5	5	6	6	5	4	5	2	6	4	6	3	6	6	5
2017/02/09 11:31:08 PM GMT	Happeee	Female	18	United Kingdom	United Kingdom	Yes	13	6	6	3	5	3	3	1	3	6	2	1	4	3	2	5	1	6	1	3	5	1	1	NA	3	4	3	4	2	2	1	1	1	1	3	2	4	2	1	1	6	6	4
2017/02/09 12:41:55 PM GMT	Harambe	Male	20	Greece	United Kingdom	Yes	14	6	5	3	4	2	4	4	3	4	5	3	5	2	3	4	3	6	4	3	2	2	2	NA	3	4	2	4	4	4	3	5	3	4	4	3	4	3	4	2	5	3	2
2017/02/09 12:52:55 PM GMT	Harambe	Male	21	Greece	United Kingdom	Yes	15	6	4	3	2	2	1	2	3	5	4	1	5	4	1	6	2	6	2	1	1	1	2	NA	3	2	5	1	5	2	1	2	2	4	5	4	6	5	6	5	5	1	5
2017/02/10 6:17:27 PM GMT	Hector	Male	22	United Kingdom	United Kingdom	Yes	14	6	1	5	6	3	3	2	5	6	6	4	2	1	4	6	2	5	1	1	3	2	2	NA	3	3	2	2	2	5	5	5	3	2	6	4	6	6	6	5	6	5	4
2017/02/16 3:09:45 pm GMT	Herm	Female	20	United States	United States	Yes	8	7	6	6	5	6	5	6	4	6	5	6	1	4	1	6	1	6	2	6	5	3	5	5	6	6	6	6	4	6	6	5	6	6	6	5	6	6	5	3	6	6	5
2017/02/16 3:59:42 pm GMT	Herm	Female	24	United Kingdom	United States	No	17	8	2	6	1	1	1	6	6	6	6	6	1	6	1	6	3	6	6	6	5	6	2	5	3	6	6	6	6	6	6	5	6	2	5	5	6	6	5	6	5	6	3
2017/02/15 11:28:04 am GMT	Heskey9	Male	23	United Kingdom	United Kingdom	Yes	16	6	5	6	3	1	3	2	1	1	2	1	6	1	1	6	3	2	5	1	1	1	1	1	4	1	1	1	2	6	4	2	1	2	6	1	6	3	5	1	6	2	5
2017/02/15 9:00:25 pm GMT	Heskey9	Male	24	United Kingdom	United Kingdom	Yes	17	7	5	5	4	3	3	4	3	2	3	2	5	1	2	6	3	5	4	2	2	1	2	4	3	2	2	2	3	6	3	5	2	2	5	3	6	5	6	4	6	5	4
2017/02/15 3:55:53 pm GMT	Homies	Female	21	United Kingdom	United Kingdom	No	16	6	6	5	6	6	5	3	3	6	6	6	5	2	2	6	2	3	4	6	2	6	2	6	5	6	3	5	1	6	6	4	6	2	5	2	6	2	5	4	6	6	5
2017/02/15 6:26:42 pm GMT	Homies	Male	25	United Kingdom	United Kingdom	No	17	6	2	4	4	4	3	2	2	4	5	4	2	1	2	6	3	6	1	5	2	5	1	4	5	3	4	5	5	5	5	6	4	5	5	1	6	5	5	3	5	5	2
2017/02/17 8:33:37 am GMT	Homies	Male	24	United Kingdom	United Kingdom	No	17	3	6	6	5	4	5	3	4	5	4	3	6	1	1	5	4	6	6	4	1	6	2	6	6	4	3	4	6	5	6	6	5	3	4	3	6	5	6	5	6	5	2
2017/02/07 11:14:26 PM GMT	Jadey	Female	22	United Kingdom	United Kingdom	Yes	13	5	3	3	4	1	1	1	1	1	1	1	6	1	1	6	1	6	6	6	1	1	1	1	6	1	3	6	4	2	2	3	1	2	5	2	6	3	1	3	6	4	3
2017/02/07 11:19:27 PM GMT	Jadey	Female	22	United Kingdom	United Kingdom	No	18	5	6	2	5	2	5	1	2	1	1	1	6	1	1	6	5	6	1	6	1	6	6	1	6	1	2	2	1	6	2	6	1	6	5	5	6	3	1	6	6	4	1
2017/02/14 12:32:50 PM GMT	Jerome100	Female	23	Bulgaria	United Kingdom	No	16	5	2	5	6	4	6	1	4	1	5	6	5	1	2	6	6	6	6	6	2	5	3	NA	5	6	5	4	5	6	6	6	5	1	6	2	6	6	5	5	6	4	3
2017/02/14 12:34:41 PM GMT	Jerome100	Female	20	Bulgaria	United Kingdom	No	14	5	6	6	6	4	2	4	6	6	6	6	5	3	6	6	6	6	5	6	4	4	2	6	6	6	6	3	6	6	4	6	4	4	5	1	6	4	6	4	6	6	6
2017/02/10 5:39:21 AM GMT	Jiokoliti	Female	21	United Kingdom	United States	No	16	7	2	5	4	4	4	5	3	5	3	3	3	3	2	6	3	3	2	6	5	6	2	NA	2	4	4	4	4	5	5	2	4	2	4	5	6	6	6	6	6	5	6
2017/02/12 2:45:09 PM GMT	Jiokoliti	Female	23	United Kingdom	United Kingdom	No	16	8	5	6	3	2	1	2	3	6	4	2	6	1	1	6	3	6	2	5	2	5	1	4	2	2	5	3	4	5	5	5	3	5	5	3	6	5	4	5	5	5	5
2017/02/10 4:53:36 PM GMT	Joe	Female	19	Pakistan	United Kingdom	No	15	7	6	6	5	3	5	6	5	6	4	3	4	3	2	6	6	6	6	4	5	1	5	NA	2	4	2	5	3	6	1	5	4	4	5	1	6	4	5	1	6	1	3
2017/02/10 6:08:54 PM GMT	Joe	Female	18	Pakistan	Pakistan	No	10	9	6	4	3	3	5	5	5	5	3	3	4	4	1	1	2	5	1	5	4	1	5	NA	5	4	1	4	4	4	3	4	3	1	4	2	2	3	3	5	6	6	4
2017/02/09 11:12:27 AM GMT	JoJo	Female	21	United Kingdom	Australia	No	15	8	5	6	4	3	5	4	3	6	5	5	4	2	3	5	2	6	5	5	2	5	5	3	5	4	4	5	5	5	5	5	5	4	6	3	6	5	4	5	6	6	6
2017/02/09 10:23:43 PM GMT	K	Female	18	United Kingdom	United Kingdom	No	12	3	6	5	6	2	4	2	4	5	1	1	6	1	4	6	4	5	6	1	1	2	6	NA	6	1	1	5	1	2	6	4	2	1	2	1	6	4	2	6	6	6	5
2017/02/08 11:42:48 AM GMT	Keeks	Female	21	United Kingdom	United Kingdom	No	16	6	4	6	3	6	6	4	4	5	4	4	1	2	2	6	3	5	6	4	3	6	3	4	6	4	3	3	4	4	5	6	5	6	4	3	6	4	4	3	5	5	2
2017/02/08 4:43:46 PM GMT	Keith Moore	Female	20	New Zealand	United Kingdom	No	15	7	6	5	5	5	4	3	5	6	4	5	3	1	1	6	3	6	4	2	6	6	1	5	4	6	4	3	4	6	4	4	4	3	4	5	6	4	6	6	5	5	4
2017/02/08 7:01:12 PM GMT	Keith Moore	Female	23	New Zealand	New Zealand	No	16	7	6	5	6	6	5	6	4	6	4	4	6	6	3	6	4	4	6	5	4	4	3	6	6	4	6	4	6	6	6	6	6	4	6	3	6	5	6	6	6	6	5
2017/02/09 7:34:29 PM GMT	KEL	Female	22	United Kingdom	United Kingdom	No	14	5	6	5	6	2	5	1	3	6	6	3	5	1	2	6	6	6	6	1	1	3	6	2	6	3	2	2	2	5	6	6	4	4	3	3	6	4	4	5	5	4	5
2017/02/13 2:59:14 PM GMT	Kerna	Female	20	United Kingdom	United Kingdom	No	16	8	5	4	1	1	3	2	4	3	3	3	1	1	5	6	3	5	2	1	1	1	1	NA	2	2	1	4	2	6	1	3	1	5	5	3	6	3	4	5	6	5	1
2017/02/15 8:58:09 pm GMT	Kerna	Male	22	United Kingdom	United Kingdom	No	16	7	3	3	2	2	1	3	2	2	2	3	6	1	1	4	5	4	1	1	1	1	1	1	5	2	2	2	1	2	2	2	2	2	4	2	6	5	3	4	5	4	2
2017/02/09 10:06:54 PM GMT	Kerr01	Female	24	United Kingdom	United Kingdom	No	15	8	1	6	1	3	4	4	3	1	6	3	6	1	2	6	6	6	3	1	1	5	1	6	6	2	2	2	2	4	6	5	5	6	2	2	6	1	3	6	5	6	4
2017/02/09 9:49:59 PM GMT	Kerr01	Female	27	United Kingdom	United Kingdom	No	17	4	2	6	3	1	2	1	2	1	3	1	5	1	1	6	4	5	3	5	2	5	2	1	3	3	3	4	4	3	3	4	2	3	5	3	6	5	5	5	5	5	4
2017/02/09 11:29:00 AM GMT	Latics	Male	21	United Kingdom	United Kingdom	No	16	4	5	3	4	3	2	2	3	6	2	2	6	1	2	6	5	6	2	4	1	2	3	4	4	3	4	3	3	5	3	3	4	3	5	5	6	4	5	3	6	5	3
2017/02/09 5:21:10 PM GMT	Latics	Male	18	United Kingdom	United Kingdom	No	11	7	5	5	5	5	6	3	3	6	6	4	3	1	2	5	3	3	6	2	1	2	1	NA	1	2	4	5	6	5	5	5	3	4	6	3	6	2	5	5	6	5	5
2017/02/08 5:25:29 PM GMT	Lions	Male	24	Canada	United Kingdom	No	17	5	5	4	4	4	4	4	3	6	2	4	6	4	1	6	3	4	2	3	2	4	1	4	2	4	5	3	4	6	5	4	4	6	5	4	1	6	5	4	6	5	5
2017/02/08 7:58:16 PM GMT	Lions	Male	22	Canada	Canada	No	13	7	4	3	1	1	5	3	1	6	6	1	6	1	1	6	6	6	6	1	1	1	1	NA	6	1	1	1	4	1	6	6	1	6	6	4	1	6	4	1	6	6	1
2017/02/09 11:01:12 PM GMT	livifan	Male	28	United Kingdom	United Kingdom	Yes	12	7	4	5	4	4	4	1	4	6	4	3	1	1	2	6	6	4	1	2	3	1	2	1	2	3	6	4	3	4	3	5	4	6	6	2	6	5	2	5	6	4	2
2017/02/09 8:51:51 PM GMT	livifan	Female	21	United Kingdom	United Kingdom	Yes	17	5	4	6	5	4	4	2	5	5	5	4	5	3	2	6	4	5	4	5	4	2	3	2	6	5	5	5	4	6	6	6	6	4	4	5	6	4	5	5	6	6	2
2017/02/08 11:22:08 PM GMT	Louis	Male	23	United Kingdom	Australia	No	3	6	4	6	1	1	4	4	2	1	3	4	6	6	3	6	6	5	6	3	1	1	6	4	5	2	4	3	4	6	6	6	3	2	6	3	6	6	6	3	6	4	3
2017/02/08 11:30:41 PM GMT	Louis	Male	21	United Kingdom	United Kingdom	No	17	6	1	6	6	1	6	6	1	6	1	3	4	1	1	6	5	5	1	1	2	1	1	4	2	1	1	1	1	4	3	6	3	1	2	5	6	4	1	4	5	3	1
2017/02/08 11:43:39 PM GMT	Lulujuju	Female	20	France	United Kingdom	No	17	6	3	3	4	1	5	2	3	6	3	1	5	1	1	5	4	5	1	1	1	1	1	2	1	1	1	2	1	6	5	2	2	5	4	2	6	3	2	5	6	5	5
2017/02/09 12:30:32 AM GMT	Lulujuju	Female	18	France	United Kingdom	No	16	2	6	1	5	4	5	5	3	6	3	4	6	3	4	6	5	6	1	3	3	3	4	NA	4	4	3	3	4	5	5	3	5	4	5	2	4	4	3	6	6	6	5
2017/02/10 10:12:32 AM GMT	Manueras	Female	21	United Kingdom	Australia	No	18	6	6	5	3	6	6	4	6	6	6	6	6	3	3	6	6	6	6	6	6	6	3	6	3	6	6	4	6	6	6	6	6	6	6	4	6	6	6	6	6	6	6
2017/02/10 10:17:00 AM GMT	Manueras	Female	24	United Kingdom	United Kingdom	No	18	7	2	5	2	4	5	3	4	6	6	5	6	4	2	6	6	6	6	5	3	5	5	6	6	5	2	2	5	5	6	6	5	4	6	4	6	5	5	6	6	6	6
2017/02/10 4:16:39 PM GMT	Manueras	Female	18	United Kingdom	United Kingdom	No	11	7	5	6	4	4	6	3	3	6	6	3	6	1	2	6	5	5	6	5	1	5	3	NA	3	2	3	4	5	5	6	5	4	2	5	4	6	3	5	5	6	6	6
2017/02/14 10:19:45 PM GMT	MC	Female	20	United Kingdom	United Kingdom	No	16	7	4	5	3	2	4	4	4	1	4	2	5	1	2	5	4	5	1	1	2	1	3	1	2	2	3	3	2	5	3	5	3	2	4	2	6	3	3	4	6	5	5
2017/02/14 10:25:28 PM GMT	MC	Female	18	United Kingdom	United Kingdom	No	13	7	4	3	3	1	1	1	3	5	2	1	4	2	2	6	4	3	3	1	1	2	6	NA	5	1	1	1	3	1	2	2	1	3	5	3	6	3	2	4	6	5	4
2017/02/10 12:43:59 PM GMT	Michael	Male	20	United Kingdom	United Kingdom	No	16	7	4	5	2	4	2	1	4	6	3	2	2	1	1	4	3	6	1	5	4	5	1	1	4	2	2	2	4	6	3	4	3	5	5	3	6	5	3	3	6	5	4
2017/02/07 11:27:30 PM GMT	Millsy	Male	22	United Kingdom	United Kingdom	Yes	17	7	3	6	5	4	6	5	4	6	4	3	1	1	6	6	4	6	1	3	1	1	2	2	6	3	2	4	5	6	5	4	2	4	5	3	6	3	6	6	6	6	6
2017/02/08 1:53:11 AM GMT	Millsy	Female	22	United Kingdom	United Kingdom	Yes	14	8	2	5	1	2	5	4	3	5	3	2	6	1	4	6	4	6	1	1	1	3	1	3	3	2	5	2	1	5	6	4	2	4	5	2	6	5	3	3	6	3	4
2017/02/10 4:13:46 PM GMT	mmwmtm	Male	24	Austria	United Kingdom	No	17	5	5	3	4	3	5	5	3	6	5	4	5	1	1	6	4	5	1	1	4	1	1	NA	5	5	3	5	3	5	6	5	4	1	6	3	5	6	6	3	6	4	5
2017/02/10 4:25:18 PM GMT	mmwmtm	Male	20	Austria	United Kingdom	No	15	6	5	5	3	2	5	5	4	6	6	4	5	1	1	6	3	6	5	2	3	2	1	NA	6	4	2	2	3	5	5	5	4	4	3	2	1	4	6	5	5	5	2
2017/02/15 9:33:40 pm GMT	mountain	Male	21	United Kingdom	Canada	No	16	6	4	6	1	4	4	2	2	2	4	2	6	1	1	6	5	2	3	3	1	5	2	NA	2	2	4	2	4	5	3	5	2	2	2	5	6	3	6	6	6	5	1
2017/02/16 8:42:12 am GMT	mountain	Male	24	United Kingdom	United Kingdom	No	18	7	5	6	2	4	5	1	3	6	6	4	6	1	3	6	5	6	1	5	4	5	3	5	3	4	4	3	3	6	5	5	5	1	5	4	6	5	6	5	6	2	1
2017/02/10 10:29:52 PM GMT	Mutchie	Male	24	United Kingdom	United Kingdom	No	13	7	2	4	5	3	5	1	1	5	3	2	4	1	1	6	3	5	2	1	1	1	5	1	3	2	2	2	3	4	4	4	2	4	5	3	6	2	3	3	4	3	2
2017/02/10 10:33:03 PM GMT	Mutchie	Male	21	United Kingdom	United Kingdom	No	18	8	4	3	3	2	4	3	3	6	3	3	3	1	4	5	4	6	1	1	1	1	2	3	4	3	4	2	3	6	3	5	2	3	4	3	6	4	5	3	5	3	1
2017/02/09 8:33:23 PM GMT	Nacho	Female	18	United Kingdom	United Kingdom	No	14	6	4	5	6	4	5	4	4	4	4	3	6	3	4	5	5	5	2	3	5	5	3	6	6	4	4	3	4	6	3	4	5	5	4	3	6	6	5	4	6	6	5
2017/02/16 2:58:59 pm GMT	nandeddie	Female	21	United Kingdom	United Kingdom	No	17	8	5	6	2	2	5	5	5	2	2	3	6	1	1	6	4	6	2	4	1	4	1	3	6	3	4	5	2	6	6	4	4	6	5	2	6	5	4	4	4	6	3
2017/02/16 3:35:44 pm GMT	nandeddie	Male	19	United Kingdom	United Kingdom	No	12	7	4	6	5	3	6	4	3	6	6	5	6	1	2	6	6	6	6	5	2	3	1	5	6	6	5	6	3	6	6	5	5	3	4	3	6	4	6	5	6	3	2
2017/02/10 1:51:23 AM GMT	Nat	Female	19	United Kingdom	United Kingdom	Yes	13	7	3	3	1	3	3	2	1	1	1	1	5	2	1	5	1	6	4	3	1	6	2	NA	2	2	2	4	1	4	3	4	3	2	4	4	4	5	5	6	6	4	5
2017/02/10 6:34:46 AM GMT	Nich	Male	19	United Kingdom	United Kingdom	No	16	7	6	6	3	3	5	3	4	3	5	2	5	1	4	6	5	5	2	2	2	4	2	5	3	2	3	4	3	5	6	6	5	5	5	2	6	6	5	5	6	6	6
2017/02/10 9:26:05 PM GMT	Nich	Male	25	United Kingdom	Australia	No	15	7	5	6	2	4	5	4	3	5	4	5	5	1	1	6	4	5	1	3	1	1	6	1	6	1	1	3	1	6	6	6	5	6	5	3	6	6	4	5	6	5	1
2017/02/09 10:12:03 PM GMT	Noble	Female	19	United Kingdom	United Kingdom	No	14	2	6	3	5	4	5	3	4	6	6	5	5	2	4	6	5	6	2	3	3	3	1	5	4	4	3	3	3	4	5	3	3	6	5	3	6	5	5	6	6	5	4
2017/02/09 10:13:36 PM GMT	Noble	Female	18	United Kingdom	United Kingdom	No	13	3	4	6	5	5	4	4	4	6	5	3	5	3	5	6	6	6	4	3	5	6	2	NA	3	3	5	5	4	5	6	4	5	5	5	1	6	3	5	5	6	4	5
2017/02/08 12:32:14 PM GMT	Olg	Female	22	United Kingdom	United Kingdom	No	15	7	5	6	3	3	5	2	3	5	5	3	5	1	2	5	5	5	1	2	2	5	1	4	2	1	2	1	4	6	5	6	3	5	4	2	5	5	5	6	5	4	1
2017/02/08 5:44:25 PM GMT	Olg	Female	20	United Kingdom	United Kingdom	No	16	5	5	6	5	2	5	4	2	3	4	2	6	2	1	1	4	4	1	5	2	1	2	1	5	4	5	4	2	4	4	2	4	5	6	2	6	5	2	6	5	4	5
2017/02/09 11:48:50 PM GMT	Park Lane & Mayfair	Female	45	United Kingdom	United Kingdom	No	11	4	1	6	4	2	4	1	2	4	3	2	4	1	3	6	2	2	1	1	1	1	1	3	1	2	1	1	4	6	5	5	1	1	6	1	6	2	1	4	6	5	4
2017/02/09 11:55:56 PM GMT	Park Lane & Mayfair	Female	40	United Kingdom	United Kingdom	Yes	14	3	2	5	3	2	2	2	2	6	3	1	5	1	2	1	5	4	1	3	6	1	1	NA	2	2	6	2	2	6	6	6	4	4	5	3	6	5	2	6	6	5	2
2017/02/09 1:06:24 PM GMT	Parshnip	Male	22	United Kingdom	United Kingdom	Yes	18	6	6	6	1	2	3	4	1	3	1	2	1	1	1	3	6	3	4	6	1	6	6	1	4	1	6	6	1	3	6	3	6	6	3	3	6	2	6	1	2	4	6
2017/02/08 1:14:29 AM GMT	Peg and Pach	Female	22	United Kingdom	United Kingdom	Yes	4	5	5	6	3	3	3	2	3	6	5	4	5	1	2	6	5	6	2	4	1	4	6	3	6	4	4	4	4	5	5	5	5	3	4	1	6	2	3	6	3	4	6
2017/02/09 9:11:32 PM GMT	Pepper	Female	50	United States	United Kingdom	No	30	7	6	6	4	3	6	5	3	6	5	6	4	6	4	6	6	6	6	4	6	6	5	NA	5	6	5	4	4	6	6	6	6	5	4	2	6	4	6	4	6	6	6
2017/02/10 1:46:45 AM GMT	Pepper	Female	45	United States	United States	No	12	8	6	6	1	3	1	4	4	6	3	5	5	1	2	6	6	6	1	6	1	6	3	6	6	5	6	4	5	6	6	5	5	6	5	2	6	5	5	4	6	5	4
2017/02/08 12:38:08 PM GMT	pinkhair	Female	19	United Kingdom	United Kingdom	No	16	5	4	6	4	5	4	4	3	6	6	3	5	1	1	2	3	6	1	2	5	2	1	5	6	5	4	5	5	1	6	5	5	1	6	2	3	2	3	6	5	6	2
2017/02/08 12:48:22 PM GMT	pinkhair	Male	24	United Kingdom	United Kingdom	No	18	7	2	4	1	1	5	3	4	1	4	1	5	1	1	6	1	6	6	1	1	1	1	1	6	1	4	4	3	6	6	5	3	6	6	1	6	6	3	6	5	5	1
2017/02/08 7:56:23 PM GMT	PiratesWhoDon'tDoAnything	Female	21	United States	Ireland	No	15	8	4	6	5	4	6	4	3	6	6	4	6	4	2	6	4	6	5	4	2	4	3	5	5	3	4	4	5	6	6	5	5	6	6	3	6	3	5	5	6	5	5
2017/02/08 1:32:19 AM GMT	Pizza	Female	20	Italy	Italy	Yes	17	4	6	3	1	4	6	5	6	6	6	6	6	1	1	6	6	6	1	2	6	3	6	NA	6	5	4	4	5	6	6	6	4	6	6	1	6	4	6	2	6	6	6
2017/02/14 8:41:53 PM GMT	Pizza	Female	20	Italy	Italy	Yes	14	5	6	4	1	1	3	1	6	6	1	1	1	1	6	6	6	1	1	3	1	1	1	NA	6	6	5	1	3	4	6	6	3	6	6	1	6	3	3	6	6	6	6
2017/02/09 6:14:20 PM GMT	Poffle	Female	21	United Kingdom	Germany	No	15	8	1	6	5	6	6	5	5	6	6	6	6	5	5	6	5	6	5	6	6	6	2	6	4	6	6	3	6	5	6	6	6	6	5	5	6	6	5	5	6	6	6
2017/02/09 8:03:29 PM GMT	Poffle	Male	23	United Kingdom	United Kingdom	No	10	8	5	5	3	2	4	3	5	5	4	4	3	3	3	5	4	4	3	2	2	6	1	5	2	3	5	1	4	5	4	3	4	2	4	4	6	4	4	3	4	2	2
2017/02/08 11:38:20 AM GMT	rafiki	Female	20	United Kingdom	United Kingdom	No	17	7	5	4	5	2	4	4	3	4	4	3	5	2	2	5	3	4	2	3	2	5	3	3	4	4	3	4	4	3	5	3	4	3	4	3	4	3	3	5	5	5	4
2017/02/08 11:37:26 AM GMT	RCM	Female	20	United Kingdom	United Kingdom	Yes	16	7	2	6	2	4	5	1	4	1	2	2	6	4	2	5	5	5	1	2	2	3	1	5	1	3	6	5	3	2	5	5	4	1	5	3	6	3	5	6	5	5	6
2017/02/09 12:14:57 PM GMT	RGJG	Female	20	United Kingdom	United Kingdom	No	15	7	3	5	3	3	4	3	3	6	4	2	5	1	2	6	5	5	2	4	2	5	5	4	3	4	2	2	2	6	6	3	5	2	4	3	5	5	5	5	5	5	6
2017/02/09 4:43:55 PM GMT	RGJG	Male	22	United Kingdom	United Kingdom	Yes	13	7	2	4	6	2	6	2	3	5	4	3	2	1	5	6	6	4	6	4	4	3	1	1	1	2	3	2	1	3	6	6	3	2	5	3	6	5	5	5	6	5	4
2017/02/12 10:43:55 PM GMT	Ricky and Conor	Male	21	United Kingdom	United Kingdom	No	17	7	3	5	5	5	6	5	6	1	4	5	6	6	4	6	6	3	6	5	6	5	6	5	3	5	2	4	6	6	6	6	6	3	5	1	1	5	6	1	4	4	1
2017/02/08 12:45:45 PM GMT	Saucisse	Female	21	France	United Kingdom	No	5	6	2	6	1	4	6	6	3	6	5	5	6	1	6	6	6	6	5	6	3	1	1	5	2	5	4	6	6	6	5	2	6	4	6	6	6	6	6	6	6	6	6
2017/02/08 5:53:50 PM GMT	Saucisse	Female	18	France	France	No	14	3	2	4	1	1	4	4	5	6	4	3	6	1	5	6	5	6	1	5	1	6	2	NA	2	4	4	4	4	1	6	4	5	4	5	1	6	3	1	6	6	4	4
2017/02/27 12:48:51 am GMT	Scott Sistets	Female	43	United Kingdom	United Kingdom	Yes	13	7	6	6	6	5	5	1	3	1	2	1	6	1	1	6	2	6	1	1	1	5	1	NA	6	1	2	1	2	6	5	5	4	6	5	2	6	5	5	6	6	6	6
2017/02/10 10:36:32 PM GMT	Siblings123	Male	21	United Kingdom	United Kingdom	No	14	6	6	3	2	2	5	4	2	2	2	2	5	1	1	6	4	3	3	1	1	1	2	1	2	1	1	1	1	1	3	4	2	4	4	3	4	4	4	5	6	6	4
2017/02/10 10:40:47 PM GMT	Siblings123	Female	22	United Kingdom	United Kingdom	No	17	6	6	4	1	3	6	4	3	5	5	4	4	1	1	6	6	6	6	3	2	4	1	1	5	2	1	2	3	5	6	6	4	6	5	3	5	4	5	6	6	4	2
2017/02/09 10:32:30 PM GMT	Sissy	Female	25	United Kingdom	United Kingdom	Yes	11	9	3	5	4	4	4	2	3	1	6	3	5	1	3	1	3	6	4	4	3	1	6	NA	6	3	1	1	5	6	6	6	6	6	6	2	6	3	6	6	6	6	6
2017/02/09 10:42:02 PM GMT	Smo	Female	20	Lebanon	Canada	Yes	3	7	3	5	1	1	4	5	5	6	1	2	1	1	1	4	1	6	4	4	1	1	1	NA	1	2	2	3	2	5	3	4	2	2	6	3	6	2	6	5	6	4	6
2017/02/09 7:21:04 PM GMT	Smo	Female	20	Lebanon	Canada	Yes	10	8	5	6	3	3	2	3	4	4	3	4	2	1	2	1	3	5	4	3	3	5	4	NA	5	4	3	4	3	1	3	4	2	2	5	2	6	3	2	6	6	5	6
2017/02/08 10:55:55 PM GMT	Squidgy	Female	22	United Kingdom	United Kingdom	No	17	8	6	5	5	6	6	5	4	6	6	6	1	4	3	6	5	4	6	6	6	6	4	6	5	6	4	4	6	5	5	4	5	5	4	3	6	3	5	5	5	5	6
2017/02/08 11:11:21 PM GMT	Squidgy	Female	20	United Kingdom	Australia	No	17	8	2	4	4	2	2	1	1	3	3	1	4	1	1	6	1	1	4	1	1	1	2	NA	2	1	2	1	2	3	2	2	2	2	3	2	5	4	2	4	5	5	4
2017/02/08 6:34:15 AM GMT	Starling	Female	29	United States	United States	No	24	3	5	6	5	3	3	4	4	6	6	3	5	6	5	6	5	6	5	6	5	2	2	6	6	4	2	5	5	1	6	6	4	6	6	5	5	5	6	6	6	4	4
2017/02/08 6:49:31 AM GMT	Starling	Female	25	United States	United States	Yes	6	4	4	6	6	3	1	6	4	1	1	4	6	6	1	3	2	6	5	5	1	4	1	5	6	5	6	4	4	1	6	6	2	3	2	4	6	1	6	6	6	4	6
2017/02/07 11:00:21 PM GMT	Sunshine	Male	18	United Kingdom	United Kingdom	Yes	13	7	6	3	2	4	2	3	3	6	5	4	3	3	1	3	6	6	2	2	6	6	4	5	3	4	5	2	5	2	4	6	5	4	5	2	2	5	5	6	6	5	1
2017/02/07 11:06:59 PM GMT	Sunshine	Male	18	United Kingdom	United Kingdom	Yes	11	7	5	6	2	3	3	1	2	2	2	3	5	1	3	6	6	1	4	6	2	5	1	1	6	1	1	1	1	1	1	1	1	3	6	1	3	3	1	5	6	4	1
2017/02/09 1:52:23 PM GMT	Swagmoney	Male	20	United Kingdom	United Kingdom	Yes	16	6	5	4	2	1	5	2	3	6	4	3	5	1	1	6	5	6	5	2	1	1	3	2	6	2	2	4	2	3	5	5	5	2	4	3	6	5	5	5	6	6	4
2017/02/09 2:10:58 PM GMT	Swagmoney	Female	18	United Kingdom	United Kingdom	Yes	13	6	5	6	6	4	5	5	5	6	6	2	3	2	4	6	6	6	5	2	5	6	2	6	5	2	3	4	3	6	6	6	2	4	5	3	6	2	6	4	6	5	6
2017/02/10 7:36:58 PM GMT	swiper	Male	18	United Kingdom	United Kingdom	No	12	7	4	5	4	2	6	5	2	6	4	1	3	1	1	4	5	6	6	1	1	1	3	NA	6	2	6	1	1	2	6	1	3	1	3	2	6	6	6	5	6	6	2
2017/02/11 11:57:15 AM GMT	swiper	Female	22	United Kingdom	Netherlands	No	17	7	6	2	4	4	6	4	4	6	6	6	5	4	2	6	2	6	5	6	6	6	5	6	5	4	6	4	6	6	6	5	5	3	5	4	6	3	5	5	6	6	6
2017/02/08 12:06:47 PM GMT	Tabhad	Male	18	United Kingdom	United Kingdom	No	14	5	5	4	4	3	3	5	4	6	5	4	5	4	2	6	4	6	2	3	3	2	5	5	2	3	5	2	3	5	3	2	3	3	5	2	6	5	3	5	6	5	4
2017/02/08 12:16:12 PM GMT	Tabhad	Female	21	United Kingdom	United Kingdom	No	17	5	5	4	2	3	4	4	3	3	2	2	5	1	2	6	2	3	5	5	2	5	4	2	4	2	5	2	4	6	5	5	5	1	4	3	6	5	6	5	6	3	6
2017/02/10 4:08:35 PM GMT	Teedah	Male	18	United Kingdom	United Kingdom	No	14	7	3	3	2	3	3	3	3	4	4	3	3	1	2	6	3	5	1	1	1	1	1	1	4	1	2	1	2	3	4	2	1	2	4	1	1	1	6	5	6	6	4
2017/02/10 4:33:22 PM GMT	Teedah	Female	18	United Kingdom	United Kingdom	No	13	2	6	6	4	4	6	2	3	6	6	3	3	1	1	6	3	6	2	1	1	2	1	NA	3	2	4	5	4	2	6	3	3	2	6	2	6	6	6	6	6	6	6
2017/02/10 8:14:03 PM GMT	Teenie	Female	22	United Kingdom	United Kingdom	No	17	6	6	6	3	3	5	4	3	6	4	4	1	1	2	6	6	6	5	5	2	6	2	5	4	4	3	4	5	6	4	6	3	2	5	2	6	4	6	5	6	6	6
2017/02/08 1:19:07 PM GMT	The Freud Eggs	Female	19	United Kingdom	United Kingdom	No	14	5	5	6	5	5	4	3	5	6	6	3	6	2	1	6	5	5	1	1	1	2	1	6	6	4	3	4	4	6	5	3	4	1	5	2	6	5	3	4	6	6	6
2017/02/08 2:06:09 PM GMT	The Freud Eggs	Male	20	United Kingdom	United Kingdom	No	15	5	4	6	6	3	5	2	4	6	2	5	5	1	1	6	5	5	1	5	1	6	1	NA	5	4	2	4	1	6	6	4	5	1	5	2	6	3	5	6	6	4	6
2017/02/08 8:34:21 PM GMT	Thirsk	Female	21	United Kingdom	United Kingdom	No	18	6	2	1	2	2	5	4	4	6	4	3	6	1	2	6	6	5	4	5	2	5	5	NA	6	2	4	2	3	5	1	4	5	5	2	3	6	2	2	3	4	5	2
2017/02/08 8:45:24 PM GMT	Thirsk	Female	24	United Kingdom	United Kingdom	No	20	7	5	6	5	3	6	6	4	6	6	3	6	1	1	6	1	6	1	1	1	1	6	1	6	1	4	2	5	6	6	6	4	6	4	2	5	3	6	6	6	4	6
2017/02/16 11:21:55 pm GMT	Tiny weenar	Female	20	United Kingdom	United Kingdom	Yes	16	8	4	5	4	2	4	4	4	3	2	3	3	2	2	5	4	6	4	4	4	3	2	3	2	2	2	4	3	5	5	6	4	2	5	2	6	5	1	5	6	5	6
2017/02/10 3:13:32 PM GMT	Tit	Male	18	United Kingdom	United Kingdom	Yes	13	7	3	3	4	4	2	3	2	4	2	1	4	5	1	6	1	4	1	1	1	1	1	1	5	1	1	1	3	5	4	5	1	4	6	5	6	3	6	5	4	5	1
2017/02/10 6:06:45 PM GMT	TitsMcGee420	Male	24	United Kingdom	United Kingdom	No	4	7	4	6	4	6	6	2	6	4	5	3	4	5	1	6	6	2	6	6	6	6	6	4	6	3	4	2	5	4	6	4	6	6	5	4	6	4	6	6	6	5	4
2017/02/10 7:25:48 PM GMT	TitsMcGee420	Female	21	United Kingdom	United Kingdom	No	0	5	6	6	5	2	3	2	2	3	2	1	6	1	1	6	3	6	4	2	2	1	3	NA	2	1	2	4	4	4	5	4	5	4	6	3	6	6	1	5	6	6	6
2017/02/16 4:49:09 pm GMT	Toasty Kath	Female	25	United Kingdom	United Kingdom	No	15	5	5	6	4	2	6	2	3	6	3	4	6	2	2	6	5	6	6	5	6	5	3	3	6	3	5	5	5	6	6	2	5	1	4	3	6	6	6	6	6	5	6
2017/02/09 11:21:22 PM GMT	Trump	Female	21	United Kingdom	United Kingdom	No	16	7	6	6	2	3	4	2	5	4	4	5	5	4	1	6	2	6	3	6	4	6	4	5	5	5	3	3	4	6	4	3	3	1	5	2	6	6	6	6	6	6	6
2017/02/09 11:21:55 PM GMT	Trump	Male	21	United Kingdom	United Kingdom	No	13	7	6	2	4	2	4	1	4	2	4	2	4	1	3	6	4	5	3	2	1	5	5	2	6	2	3	4	4	3	5	4	4	3	4	2	3	1	3	6	6	6	4
2017/02/09 8:54:14 PM GMT	tweedie	Female	22	United Kingdom	United Kingdom	Yes	12	8	2	2	1	1	1	1	1	1	1	1	2	1	1	4	1	2	1	1	1	1	1	1	2	1	1	6	1	2	1	3	1	2	5	4	6	1	2	6	6	3	2
2017/02/09 9:29:59 PM GMT	tweedie	Male	18	United Kingdom	United Kingdom	Yes	13	7	2	3	4	1	4	1	2	1	1	4	6	1	1	6	2	1	1	5	1	1	1	NA	6	1	1	6	1	5	1	1	1	1	6	3	5	4	5	2	6	5	1
2017/02/08 5:51:40 PM GMT	Twinning	Female	24	Canada	Canada	No	7	7	5	5	3	4	5	3	4	2	4	2	6	1	3	6	5	5	6	2	1	4	1	4	2	4	1	2	5	4	6	6	4	5	6	2	1	4	2	3	5	6	5
2017/02/08 6:01:28 PM GMT	Twinning	Female	24	Canada	Canada	No	7	7	5	5	3	2	4	2	2	5	4	1	5	1	3	2	4	4	5	2	1	4	2	1	1	1	6	6	1	1	4	5	2	5	2	4	1	1	2	4	6	6	6
2017/02/08 3:43:02 PM GMT	White chicks	Female	20	United Kingdom	United Kingdom	No	16	6	5	4	1	1	4	5	3	5	2	5	6	1	6	6	5	5	1	5	1	1	1	NA	3	1	1	1	2	5	4	1	1	5	6	4	6	6	1	1	6	1	4
2017/02/08 3:43:31 PM GMT	White chicks	Female	20	United Kingdom	France	No	16	6	6	6	4	3	5	2	3	6	6	4	4	1	1	3	5	6	1	4	4	4	5	1	3	3	3	4	3	5	5	5	5	3	4	2	6	6	4	6	6	5	4
2017/02/10 12:33:04 AM GMT	Wolverine	Male	19	United Kingdom	United Kingdom	No	14	7	5	3	4	1	4	1	2	6	5	2	5	1	1	6	6	4	1	1	1	1	2	NA	6	2	2	1	4	3	3	5	2	3	3	2	6	1	3	4	3	5	2
2017/02/10 12:41:13 AM GMT	Wolverine	Female	21	United Kingdom	United Kingdom	No	16	5	6	2	1	1	4	1	1	6	6	1	6	1	1	6	6	6	1	1	1	1	1	1	4	1	1	5	1	5	3	5	1	1	5	1	6	4	6	2	6	6	4
2017/02/09 11:32:43 PM GMT	xmasmorning	Female	21	Lithuania	United Kingdom	No	14	8	4	3	2	2	6	3	3	6	4	1	5	2	1	5	6	6	1	5	1	6	1	1	1	2	5	2	3	1	5	5	1	1	6	5	6	6	6	4	6	6	5
2017/02/10 5:28:49 AM GMT	xmasmorning	Male	18	Lithuania	Lithuania	No	12	7	2	5	6	4	3	2	3	5	3	2	5	1	1	6	4	5	1	4	1	1	1	1	1	3	1	2	4	5	2	4	2	2	5	1	6	6	6	2	6	5	4
2017/02/16 11:42:48 am GMT	Zanz	Female	23	United Kingdom	United Kingdom	Yes	18	6	5	6	2	2	3	3	2	2	1	1	5	2	1	6	1	6	1	1	5	3	2	2	2	2	2	2	1	3	3	3	2	1	4	1	2	2	4	3	3	5	1
[truncated: 57 more columns]
